# Supplementary material
Source: MDPI journal article supplement (https://www.mdpi.com/search?q=molecules-20-08952)
Supplement: s001 [file molecules-20-08952-s001.pdf]

## Supplementary Information

**Table S1.** Polysaccharides reported in the *Ramalina* species of lichenized fungi (Fungi: Ascomycota).

| No. | Class of Compounds | Compounds Name   | Source<br>( <i>Ramalina</i> species) | References | Current Names Of Species * |
|-----|--------------------|------------------|--------------------------------------|------------|----------------------------|
| 1   | Carbohydrates      | $\alpha$ -Glucan | <i>R. celastri</i>                   | [1–6]      | <i>R. celastri</i>         |
|     |                    |                  | <i>R. dendriscooides</i>             | [7]        | <i>R. dendriscooides</i>   |
|     |                    |                  | <i>R. fraxinea</i>                   | [7]        | <i>R. fraxinea</i>         |
|     |                    |                  | <i>R. gracilis</i>                   | [7]        | <i>R. gracilis</i>         |
|     |                    |                  | <i>R. gracilis</i> (photobiont)      | [8]        | <i>R. gracilis</i>         |
|     |                    |                  | <i>R. peruviana</i>                  | [7]        | <i>R. peruviana</i>        |
|     |                    |                  | <i>R. peruviana</i> (mycobiont)      | [9]        | <i>R. peruviana</i>        |
|     |                    |                  | <i>R. usnea</i>                      | [10]       | <i>R. australiensis</i>    |
| 2   | Galactomannan      |                  | <i>R. celastri</i>                   | [3]        | <i>R. celastri</i>         |
|     |                    |                  | <i>R. dendriscooides</i>             | [7]        | <i>R. dendriscooides</i>   |
|     |                    |                  | <i>R. ecklonii</i>                   | [1]        | <i>R. ecklonii</i>         |
|     |                    |                  | <i>R. fraxinea</i>                   | [7]        | <i>R. fraxinea</i>         |
|     |                    |                  | <i>R. gracilis</i>                   | [7]        | <i>R. gracilis</i>         |
|     |                    |                  | <i>R. gracilis</i> (photobiont)      | [8]        | <i>R. gracilis</i>         |
|     |                    |                  | <i>R. peruviana</i>                  | [7]        | <i>R. peruviana</i>        |
|     |                    |                  | <i>R. peruviana</i> (mycobiont)      | [5]        | <i>R. peruviana</i>        |
| 3   | Glucose            |                  | <i>R. usnea</i>                      | [10,11]    | <i>R. australiensis</i>    |
|     |                    |                  | <i>R. crassa</i> (mycobiont)         | [12]       | <i>R. siliquosa</i>        |
|     |                    |                  | <i>R. sinensis</i>                   | [13]       | <i>R. sinensis</i>         |
| 4   | Galactose          |                  | <i>R. fraxinea</i>                   | [14]       | <i>R. fraxinea</i>         |
|     |                    |                  | <i>R. crassa</i> (phycobiont)        | [12]       | <i>R. siliquosa</i>        |
| 5   | Mannose            |                  | <i>R. sinensis</i>                   | [13]       | <i>R. sinensis</i>         |
| 6   | Rhamnose           |                  | <i>R. sinensis</i>                   | [13]       | <i>R. sinensis</i>         |
|     |                    |                  | <i>R. fraxinea</i>                   | [14]       | <i>R. fraxinea</i>         |
| 7   | D-Arabitol         |                  | <i>R. reticulata</i>                 | [15]       | <i>R. menziessi</i>        |
|     |                    |                  | <i>R. siliquosa</i>                  | [16]       | <i>R. siliquosa</i>        |

| No. | Class of Compounds | Compounds Name    | Source<br>( <i>Ramalina species</i> ) | References | Current Names Of Species *       |
|-----|--------------------|-------------------|---------------------------------------|------------|----------------------------------|
|     |                    |                   | <i>R. calicaris</i>                   | [17]       | <i>R. calicaris</i>              |
|     |                    |                   | <i>R. sinensis</i>                    | [17]       | <i>R. sinensis</i>               |
|     |                    |                   | <i>R. tayloriana</i>                  | [18]       | <i>R. luciae</i>                 |
|     |                    |                   | <i>R. yasudae</i> (photobiont)        | [19]       | <i>R. yasudae</i>                |
|     |                    |                   | <i>R. geniculata</i>                  | [20]       | <i>R. inflata subsp. inflata</i> |
|     |                    |                   | <i>R. scopulorum</i>                  | [20]       | <i>R. siliquosa</i>              |
| 8   |                    | Mannitol          | <i>R. fraxinea</i>                    | [14]       | <i>R. fraxinea</i>               |
| 9   |                    | Glucosamine       | <i>R. fraxinea</i>                    | [14]       | <i>R. fraxinea</i>               |
| 10  |                    | Arabinose         | <i>R. fraxinea</i>                    | [14]       | <i>R. fraxinea</i>               |
| 11  |                    | Xylose            | <i>R. fraxinea</i>                    | [14]       | <i>R. fraxinea</i>               |
| 12  |                    | Glucuronic acid   | <i>R. fraxinea</i>                    | [14]       | <i>R. fraxinea</i>               |
| 13  |                    | Lentinan          | <i>R. complanata</i>                  | [21]       | <i>R. complanata</i>             |
| 14  |                    | Amylose           | <i>R. celastri</i>                    | [3]        | <i>R. celastri</i>               |
|     |                    |                   | <i>R. celastri</i> (photobiont)       | [4]        | <i>R. celastri</i>               |
|     |                    |                   | <i>R. gracilis</i> (photobiont)       | [8]        | <i>R. gracilis</i>               |
| 15  |                    | Galacturonic acid | <i>R. terebrata</i>                   | [22]       | <i>R. terebrata</i>              |
| 16  |                    | Ribitol           | <i>R. crassa</i> (phycobiont)         | [23]       | <i>R. siliquosa</i>              |
|     |                    |                   | <i>R. subbreviscula</i> (phycobiont)  | [23]       | <i>R. subbreviscula</i>          |

\* Updating scientific names validated by Index Fungorum, available at <http://www.indexfungorum.org/names/Names.asp> in May 2014.

**Table S2.** Usnic acid and derivatives reported in the *Ramalina* species of lichenized fungi (Fungi: Ascomycota).

| No.                                       | Class of Compounds         | Compounds Name      | Source                         | References    | Current Names of Species * |
|-------------------------------------------|----------------------------|---------------------|--------------------------------|---------------|----------------------------|
| 17                                        | Usnic acid and derivatives | Usnic acid          | <i>R. africana</i>             | [24]          | <i>R. africana</i>         |
|                                           |                            |                     | <i>R. asahinae</i>             | [25]          | <i>R. asahinae</i>         |
|                                           |                            |                     | <i>R. boninensis</i>           | [26,27]       | <i>R. boninensis</i>       |
|                                           |                            |                     | <i>R. boulhautina</i>          | [28]          | <i>R. boulhautiana</i>     |
|                                           |                            |                     | <i>R. anceps</i>               | [29–31]       | <i>R. anceps</i>           |
|                                           |                            |                     | <i>R. atlantica</i>            | [32]          | <i>R. cuspidata</i>        |
|                                           |                            |                     | <i>R. breviuscula</i>          | [33]          | <i>R. breviuscula</i>      |
|                                           |                            |                     | <i>R. cactacearum</i>          | [34]          | <i>R. cactacearum</i>      |
|                                           |                            |                     | <i>R. calcarata</i>            | [30]          | <i>R. calcarata</i>        |
|                                           |                            |                     | <i>R. calicaris</i>            | [9,17,35,36]  | <i>R. calicaris</i>        |
|                                           |                            |                     | <i>R. camptospora</i>          | [29,30]       | <i>R. camptospora</i>      |
|                                           |                            |                     | <i>R. capitata</i>             | [36–38]       | <i>R. capitata</i>         |
|                                           |                            |                     | <i>R. celastri</i>             | [30,39–41]    | <i>R. celastri</i>         |
|                                           |                            |                     | <i>R. celastri (mycobiont)</i> | [39]          | <i>R. celastri</i>         |
|                                           |                            |                     | <i>R. ceruchis</i>             | [42,34]       | <i>R. ceruchis</i>         |
|                                           |                            |                     | <i>R. ceruchooides</i>         | [42]          | <i>R. ceruchooides</i>     |
|                                           |                            |                     | <i>R. chilensis</i>            | [31,34,43,44] | <i>R. chilensis</i>        |
|                                           |                            |                     | <i>R. cochlearis</i>           | [30]          | <i>R. cochlearis</i>       |
|                                           |                            |                     | <i>R. combeoides</i>           | [42]          | <i>R. combeoides</i>       |
|                                           |                            |                     | <i>R. complanata</i>           | [29,30]       | <i>R. complanata</i>       |
|                                           |                            |                     | <i>R. conduplicans</i>         | [45]          | <i>R. conduplicans</i>     |
|                                           |                            |                     | <i>R. crassa</i>               | [32,46]       | <i>R. siliquosa</i>        |
|                                           |                            |                     | <i>R. crassa (mycobiont)</i>   | [46,47]       | <i>R. siliquosa</i>        |
| <i>R. curnowii</i>                        | [32,36]                    | <i>R. cuspidata</i> |                                |               |                            |
| <i>R. cuspidata</i>                       | [9,48–50]                  | <i>R. cuspidata</i> |                                |               |                            |
| <i>R. cuspidata</i> var. <i>armorica</i>  | [51]                       | <i>R. cuspidata</i> |                                |               |                            |
| <i>R. cuspidata</i> var. <i>cuspidata</i> | [51]                       | <i>R. cuspidata</i> |                                |               |                            |

| No. | Class of Compounds | Compounds Name                             | Source | References            | Current Names of Species *              |
|-----|--------------------|--------------------------------------------|--------|-----------------------|-----------------------------------------|
|     |                    | <i>R. cuspidate</i> var. <i>stenoclada</i> |        | [51]                  | <i>R. cuspidata</i>                     |
|     |                    | <i>R. darwiniana</i>                       |        | [29]                  | <i>R. darwiniana</i>                    |
|     |                    | <i>R. dendriscoides</i>                    |        | [30]                  | <i>R. dendriscoides</i>                 |
|     |                    | <i>R. dendroides</i>                       |        | [30]                  | <i>R. dendroides</i>                    |
|     |                    | <i>R. diracerata</i>                       |        | [33,52]               | <i>R. diracerata</i>                    |
|     |                    | <i>R. druidarum</i>                        |        | [32]                  | <i>R. siliquosa</i>                     |
|     |                    | <i>R. ecklonii</i>                         |        | [34,53]               | <i>R. ecklonii</i>                      |
|     |                    | <i>R. evernioides</i>                      |        | [33]                  | <i>R. evernioides</i>                   |
|     |                    | <i>R. farinacea</i>                        |        | [9,24,33,43,50,54–63] | <i>R. farinacea</i>                     |
|     |                    | <i>R. fastigiata</i>                       |        | [37,36]               | <i>R. fastigiata</i>                    |
|     |                    | <i>R. flaccescens</i>                      |        | [34,42]               | <i>R. flaccescens</i>                   |
|     |                    | <i>R. fragilis</i>                         |        | [29]                  | <i>R. fragilis</i>                      |
|     |                    | <i>R. fraxinea</i>                         |        | [14,27,36–38,64]      | <i>R. fraxinea</i>                      |
|     |                    | <i>R. furcellangulida</i>                  |        | [29]                  | <i>R. furcellangulida</i>               |
|     |                    | <i>R. geniculata</i>                       |        | [65,66]               | <i>R. inflata</i> subsp. <i>inflata</i> |
|     |                    | <i>R. glaucescens</i>                      |        | [67]                  | <i>R. glaucescens</i>                   |
|     |                    | <i>R. gracilis</i>                         |        | [30]                  | <i>R. gracilis</i>                      |
|     |                    | <i>R. grumosa</i>                          |        | [29,30]               | <i>R. grumosa</i>                       |
|     |                    | <i>R. hierrensis</i>                       |        | [68]                  | <i>R. hierrensis</i>                    |
|     |                    | <i>R. homalea</i>                          |        | [42]                  | <i>Niebla homalea</i>                   |
|     |                    | <i>R. hossei</i>                           |        | [42]                  | <i>R. hossei</i>                        |
|     |                    | <i>R. inanis</i>                           |        | [34]                  | <i>R. inanis</i>                        |
|     |                    | <i>R. inflata</i>                          |        | [40]                  | <i>R. inflata</i>                       |
|     |                    | <i>R. intermedia</i>                       |        | [33]                  | <i>R. intermedia</i>                    |
|     |                    | <i>R. kullensis</i>                        |        | [69]                  | <i>R. kullensis</i>                     |
|     |                    | <i>R. lacera</i>                           |        | [43]                  | <i>R. lacera</i>                        |
|     |                    | <i>R. landröensis</i>                      |        | [50,69]               | <i>R. landröensis</i>                   |
|     |                    | <i>R. menziensii</i>                       |        | [70]                  | <i>R. menziensii</i>                    |
|     |                    | <i>R. minuscula</i>                        |        | [50,69]               | <i>R. dilacerata</i>                    |

| No. | Class of Compounds | Compounds Name                            | Source | References          | Current Names of Species *                   |
|-----|--------------------|-------------------------------------------|--------|---------------------|----------------------------------------------|
|     |                    | <i>R. montagnei</i>                       |        | [29]                | <i>R. montagnei</i>                          |
|     |                    | <i>R. nervulosa</i>                       |        | [71]                | <i>R. nervulosa</i>                          |
|     |                    | <i>R. obtusata</i>                        |        | [27,33,50,69]       | <i>R. obtusata</i>                           |
|     |                    | <i>R. pacifica</i>                        |        | [40,71]             | <i>R. pacifica</i>                           |
|     |                    | <i>R. paludosa</i>                        |        | [72]                | <i>R. paludosa</i>                           |
|     |                    | <i>R. peranceps</i>                       |        | [31,73]             | <i>R. peranceps</i>                          |
|     |                    | <i>R. peruviana</i>                       |        | [30,34]             | <i>R. peruviana</i>                          |
|     |                    | <i>R. pollinaria</i>                      |        | [27,37,59,66,74,75] | <i>R. pollinaria</i>                         |
|     |                    | <i>R. polyforma</i>                       |        | [29]                | <i>R. polyforma</i>                          |
|     |                    | <i>R. polymorpha</i>                      |        | [36,37,59]          | <i>R. polymorpha</i>                         |
|     |                    | <i>R. prolifera</i>                       |        | [30]                | <i>R. prolifera</i>                          |
|     |                    | <i>R. puiggarii</i>                       |        | [30]                | <i>R. puiggarii</i>                          |
|     |                    | <i>R. pusilla</i>                         |        | [30]                | <i>R. inflata</i> subsp.<br><i>australis</i> |
|     |                    | <i>R. rectangularis</i>                   |        | [30]                | <i>R. rectangularis</i>                      |
|     |                    | <i>R. reticulata</i>                      |        | [15,27,33,76,77]    | <i>R. menziesii</i>                          |
|     |                    | <i>R. rigida</i>                          |        | [30]                | <i>R. rigida</i>                             |
|     |                    | <i>R. roesleri</i>                        |        | [78]                | <i>R. roesleri</i>                           |
|     |                    | <i>R. scorpulorum</i>                     |        | [16,49,50,69,79]    | <i>R. siliquosa</i>                          |
|     |                    | <i>R. sekika</i>                          |        | [27]                | <i>R. sekika</i>                             |
|     |                    | <i>R. sharpii</i>                         |        | [31]                | <i>R. sharpii</i>                            |
|     |                    | <i>R. sideriza</i>                        |        | [29]                | <i>R. sideriza</i>                           |
|     |                    | <i>R. siliquosa</i>                       |        | [9,16,32,47]        | <i>R. siliquosa</i>                          |
|     |                    | <i>R. siliquosa</i> var. <i>crassa</i>    |        | [51]                | <i>R. siliquosa</i>                          |
|     |                    | <i>R. siliquosa</i> var. <i>siliquosa</i> |        | [51]                | <i>R. siliquosa</i>                          |
|     |                    | <i>R. siliquosa</i> var. <i>x</i>         |        | [51]                | <i>R. siliquosa</i>                          |
|     |                    | <i>R. siliquosa</i> var. <i>zopfii</i>    |        | [51]                | <i>R. siliquosa</i>                          |
|     |                    | <i>R. sinensis</i>                        |        | [17,80]             | <i>R. sinensis</i>                           |
|     |                    | <i>R. solediantha</i>                     |        | [29]                | <i>R. solediantha</i>                        |

| No. | Class of Compounds | Compounds Name | Source                        | References    | Current Names of Species * |
|-----|--------------------|----------------|-------------------------------|---------------|----------------------------|
|     |                    |                | <i>R. solediosa</i>           | [29,30]       | <i>R. solediosa</i>        |
|     |                    |                | <i>R. stenoclada</i>          | [32]          | <i>R. cuspidata</i>        |
|     |                    |                | <i>R. stenospora</i>          | [81]          | <i>R. stenospora</i>       |
|     |                    |                | <i>R. subcomplanata</i>       | [43,82]       | <i>R. subcomplanata</i>    |
|     |                    |                | <i>R. subfarinacea</i>        | [9,36,50,69]  | <i>R. subfarinacea</i>     |
|     |                    |                | <i>R. subpollinaria</i>       | [30]          | <i>R. subpollinaria</i>    |
|     |                    |                | <i>R. terebrata</i>           | [83–85]       | <i>R. terebrata</i>        |
|     |                    |                | <i>R. tingitana</i>           | [86]          | <i>R. tingitana</i>        |
|     |                    |                | <i>R. tayloriana</i>          | [18]          | <i>R. luciae</i>           |
|     |                    |                | <i>R. thrausta</i>            | [50]          | <i>R. thrausta</i>         |
|     |                    |                | <i>R. tumidula</i>            | [34]          | <i>R. tumidula</i>         |
|     |                    |                | <i>R. usnea</i>               | [29–31,87]    | <i>R. australiensis</i>    |
|     |                    |                | <i>R. yasudae</i>             | [43,65]       | <i>R. yasudae</i>          |
|     |                    |                | <i>R. yasudae (mycobiont)</i> | [46]          | <i>R. yasudae</i>          |
| 18  |                    | Usimine A      | <i>R. terebrata</i>           | [83,85,88,89] | <i>R. terebrata</i>        |
| 19  |                    | Usimine B      | <i>R. terebrata</i>           | [83,85,88,89] | <i>R. terebrata</i>        |
| 20  |                    | Usimine C      | <i>R. terebrata</i>           | [83,85,88,89] | <i>R. terebrata</i>        |
| 21  |                    | Iso-usnic acid | <i>R. hierrensis</i>          | [68]          | <i>R. hierrensis</i>       |
| 22  |                    | Usnic acid     | <i>R. bornholmiensis</i>      | [50]          | <i>R. bornholmiensis</i>   |
|     |                    |                | <i>R. calicaris</i>           | [35]          | <i>R. calicaris</i>        |
|     |                    |                | <i>R. cuspidata</i>           | [50]          | <i>R. cuspidata</i>        |
|     |                    |                | <i>R. farinacea</i>           | [50]          | <i>R. farinacea</i>        |
|     |                    |                | <i>R. landroënsis</i>         | [50]          | <i>R. landroënsis</i>      |
|     |                    |                | <i>R. minuscula</i>           | [50]          | <i>R. dilacerata</i>       |
|     |                    |                | <i>R. obtusata</i>            | [50]          | <i>R. obtusata</i>         |
|     |                    |                | <i>R. scopulorum</i>          | [50]          | <i>R. siliquosa</i>        |
|     |                    |                | <i>R. subfarinacea</i>        | [50]          | <i>R. subfarinacea</i>     |
|     |                    |                | <i>R. thrausta</i>            | [50]          | <i>R. thrausta</i>         |

\* Updating scientific names validated by Index Fungorum, available at <http://www.indexfungorum.org/names/Names.asp> in May 2014.

**Table S3.** Depsides reported in the *Ramalina* species of lichenized fungi (Fungi: Ascomycota).

| No.                              | Class of Compounds | Compounds Name          | Source<br>( <i>Ramalina species</i> ) | References      | Current Names of Species *       |
|----------------------------------|--------------------|-------------------------|---------------------------------------|-----------------|----------------------------------|
| 23                               | Depsides           | Sekikaic acid           | <i>R. boulhautina</i>                 | [28,47]         | <i>R. boulhautiana</i>           |
|                                  |                    |                         | <i>R. calicaris</i>                   | [17,27]         | <i>R. calicaris</i>              |
|                                  |                    |                         | <i>R. conduplicans</i>                | [45,90]         | <i>R. conduplicans</i>           |
|                                  |                    |                         | <i>R. chilensis</i>                   | [31,44]         | <i>R. chilensis</i>              |
|                                  |                    |                         | <i>R. cochlearis</i>                  | [30]            | <i>R. cochlearis</i>             |
|                                  |                    |                         | <i>R. darwiniana</i>                  | [29]            | <i>R. darwiniana</i>             |
|                                  |                    |                         | <i>R. farinacea</i>                   | [9,54,60,66,91] | <i>R. farinacea</i>              |
|                                  |                    |                         | <i>R. farinacea var. nervulosa</i>    | [27]            | <i>R. farinacea</i>              |
|                                  |                    |                         | <i>R. fragilis</i>                    | [29]            | <i>R. fragilis</i>               |
|                                  |                    |                         | <i>R. fraxinea</i>                    | [14]            | <i>R. fraxinea</i>               |
|                                  |                    |                         | <i>R. furcellangulida</i>             | [29]            | <i>R. furcellangulida</i>        |
|                                  |                    |                         | <i>R. geniculata</i>                  | [27,43,66]      | <i>R. inflata subsp. inflata</i> |
|                                  |                    |                         | <i>R. glaucescens</i>                 | [43,67]         | <i>R. glaucescens</i>            |
|                                  |                    |                         | <i>R. hossei</i>                      | [45,92]         | <i>R. hossei</i>                 |
|                                  |                    |                         | <i>R. luciae</i>                      | [93]            | <i>R. luciae</i>                 |
|                                  |                    |                         | <i>R. montagnei</i>                   | [29]            | <i>R. montagnei</i>              |
|                                  |                    |                         | <i>R. nervulosa</i>                   | [71,94]         | <i>R. nervulosa</i>              |
|                                  |                    |                         | <i>R. peruviana</i>                   | [30,43,95]      | <i>R. peruviana</i>              |
|                                  |                    |                         | <i>R. polyforma</i>                   | [29]            | <i>R. polyforma</i>              |
|                                  |                    |                         | <i>R. pusiola</i>                     | [30]            | <i>R. pusiola</i>                |
| <i>R. roesleri</i>               | [78]               | <i>R. roesleri</i>      |                                       |                 |                                  |
| <i>R. sekika</i>                 | [27]               | <i>R. sekika</i>        |                                       |                 |                                  |
| <i>R. solediosa (race II)</i>    | [30]               | <i>R. solediosa</i>     |                                       |                 |                                  |
| <i>R. subcomplanata</i>          | [94]               | <i>R. subcomplanata</i> |                                       |                 |                                  |
| <i>R. subpollinaria (race I)</i> | [30]               | <i>R. subpollinaria</i> |                                       |                 |                                  |
| <i>R. tayloriana</i>             | [18,43]            | <i>R. luciae</i>        |                                       |                 |                                  |
| <i>R. usnea</i>                  | [30,31,87]         | <i>R. australiensis</i> |                                       |                 |                                  |

| No.                     | Class of Compounds | Compounds Name          | Source<br>( <i>Ramalina species</i> ) | References | Current Names of Species * |
|-------------------------|--------------------|-------------------------|---------------------------------------|------------|----------------------------|
| 24                      |                    | Atranorim               | <i>R. celastri</i>                    | [30]       | <i>R. celastri</i>         |
|                         |                    |                         | <i>R. combeoides</i>                  | [42]       | <i>R. combeoides</i>       |
|                         |                    |                         | <i>R. complanata</i>                  | [30]       | <i>R. complanata</i>       |
|                         |                    |                         | <i>R. darwiniana</i>                  | [29]       | <i>R. darwiniana</i>       |
|                         |                    |                         | <i>R. dendriscooides</i>              | [30]       | <i>R. dendriscooides</i>   |
|                         |                    |                         | <i>R. ecklonii</i>                    | [53]       | <i>R. ecklonii</i>         |
|                         |                    |                         | <i>R. fragilis</i>                    | [29]       | <i>R. fragilis</i>         |
|                         |                    |                         | <i>R. furcellangulida</i>             | [29]       | <i>R. furcellangulida</i>  |
|                         |                    |                         | <i>R. glaucescens</i>                 | [67]       | <i>R. glaucescens</i>      |
|                         |                    |                         | <i>R. hierrensis</i>                  | [68]       | <i>R. hierrensis</i>       |
|                         |                    |                         | <i>R. pacifica</i>                    | [40]       | <i>R. pacifica</i>         |
|                         |                    |                         | <i>R. paludosa</i>                    | [72]       | <i>R. paludosa</i>         |
|                         |                    |                         | <i>R. peruviana</i> (mycobiont)       | [95]       | <i>R. peruviana</i>        |
|                         |                    |                         | <i>R. roesleri</i>                    | [78]       | <i>R. roesleri</i>         |
|                         |                    |                         | <i>R. siliquosa</i>                   | [16,47]    | <i>R. siliquosa</i>        |
|                         |                    |                         | <i>R. stenospora</i>                  | [81]       | <i>R. stenospora</i>       |
|                         |                    |                         | <i>R. subcomplanata</i>               | [82]       | <i>R. subcomplanata</i>    |
| <i>R. subpollinaria</i> | [30]               | <i>R. subpollinaria</i> |                                       |            |                            |
| 25                      |                    | Divaricatic acid        | <i>R. aspera</i> (race I)             | [30]       | <i>R. aspera</i>           |
|                         |                    |                         | <i>R. calcarata</i>                   | [30]       | <i>R. calcarata</i>        |
|                         |                    |                         | <i>R. complanata</i> (race I)         | [30]       | <i>R. complanata</i>       |
|                         |                    |                         | <i>R. darwiniana</i>                  | [29]       | <i>R. darwiniana</i>       |
|                         |                    |                         | <i>R. furcellangulida</i>             | [29]       | <i>R. furcellangulida</i>  |
|                         |                    |                         | <i>R. hierrensis</i>                  | [68]       | <i>R. hierrensis</i>       |
|                         |                    |                         | <i>R. homalea</i>                     | [42]       | <i>Niebla homalea</i>      |
|                         |                    |                         | <i>R. menziesii</i>                   | [70]       | <i>R. menziessi</i>        |
|                         |                    |                         | <i>R. polyforma</i>                   | [29]       | <i>R. polyforma</i>        |
|                         |                    |                         | <i>R. subbreviscula</i>               | [96]       | <i>R. subbreviscula</i>    |
|                         |                    |                         | <i>R. usnea</i>                       | [87]       | <i>R. australiensis</i>    |



| No.              | Class of Compounds | Compounds Name    | Source<br>( <i>Ramalina species</i> ) | References    | Current Names of Species *              |
|------------------|--------------------|-------------------|---------------------------------------|---------------|-----------------------------------------|
| 26               |                    | Homosekikaic acid | <i>R. usnea</i> (race II)             | [30]          | <i>R. australiensis</i>                 |
|                  |                    |                   | <i>R. cochlearis</i>                  | [30]          | <i>R. cochlearis</i>                    |
|                  |                    |                   | <i>R. conduplicans</i>                | [90]          | <i>R. conduplicans</i>                  |
|                  |                    |                   | <i>R. luciae</i>                      | [93]          | <i>R. luciae</i>                        |
|                  |                    |                   | <i>R. nervulosa</i>                   | [94]          | <i>R. nervulosa</i>                     |
|                  |                    |                   | <i>R. peruviana</i>                   | [30,95]       | <i>R. peruviana</i>                     |
|                  |                    |                   | <i>R. pusiola</i>                     | [30]          | <i>R. pusiola</i>                       |
|                  |                    |                   | <i>R. roesleri</i>                    | [78]          | <i>R. roesleri</i>                      |
|                  |                    |                   | <i>R. solediosa</i>                   | [30]          | <i>R. solediosa</i>                     |
|                  |                    |                   | <i>R. subcomplanata</i>               | [94]          | <i>R. subcomplanata</i>                 |
| 27               |                    | Ramalinoic acid   | <i>R. subpollinaria</i>               | [30]          | <i>R. subpollinaria</i>                 |
|                  |                    |                   | <i>R. usnea</i>                       | [30]          | <i>R. australiensis</i>                 |
|                  |                    |                   | <i>R. calicaris</i>                   | [27,47]       | <i>R. calicaris</i>                     |
|                  |                    |                   | <i>R. cochlearis</i>                  | [30]          | <i>R. cochlearis</i>                    |
|                  |                    |                   | <i>R. farinacea</i>                   | [27,43,97]    | <i>R. farinacea</i>                     |
|                  |                    |                   | <i>R. geniculata</i>                  | [27]          | <i>R. inflata</i> subsp. <i>Inflate</i> |
|                  |                    |                   | <i>R. intermediella</i>               | [27,97]       | <i>R. intermediella</i>                 |
|                  |                    |                   | <i>R. nervulosa</i>                   | [47]          | <i>R. nervulosa</i>                     |
|                  |                    |                   | <i>R. obtusata</i>                    | [69]          | <i>R. obtusata</i>                      |
|                  |                    |                   | <i>R. peruviana</i>                   | [43,95]       | <i>R. peruviana</i>                     |
| 28               |                    | Obtusatic acid    | <i>R. usnea</i>                       | [87]          | <i>R. australiensis</i>                 |
|                  |                    |                   | <i>R. usneoides</i>                   | [27]          | <i>R. australiensis</i>                 |
|                  |                    |                   | <i>R. calicaris</i>                   | [9,35]        | <i>R. calicaris</i>                     |
|                  |                    |                   | <i>R. farinacea</i>                   | [24,57]       | <i>R. farinacea</i>                     |
|                  |                    |                   | <i>R. fraxinea</i>                    | [14]          | <i>R. fraxinea</i>                      |
|                  |                    |                   | <i>R. mediterranea</i>                | [98]          | <i>R. mediterranea</i>                  |
|                  |                    |                   | <i>R. obtusata</i>                    | [27,47,52,69] | <i>R. obtusata</i>                      |
|                  |                    |                   | <i>R. pollinaria</i>                  | [27]          | <i>R. pollinaria</i>                    |
| <i>R. sekika</i> | [27]               | <i>R. sekika</i>  |                                       |               |                                         |

| No. | Class of Compounds | Compounds Name                           | Source<br>( <i>Ramalina species</i> ) | References       | Current Names of Species * |
|-----|--------------------|------------------------------------------|---------------------------------------|------------------|----------------------------|
| 29  |                    | Tumidulin                                | <i>R. ceruchis</i>                    | [34,99]          | <i>R. ceruchis</i>         |
|     |                    |                                          | <i>R. chilensis</i>                   | [34,44]          | <i>R. chilensis</i>        |
|     |                    |                                          | <i>R. flaccescens</i>                 | [34,99]          | <i>R. flaccescens</i>      |
|     |                    |                                          | <i>R. inanis</i>                      | [34]             | <i>R. inanis</i>           |
|     |                    |                                          | <i>R. peruviana</i>                   | [34]             | <i>R. peruviana</i>        |
|     |                    |                                          | <i>R. tumidula</i>                    | [34,100]         | <i>R. tumidula</i>         |
| 30  |                    | 4'- <i>O</i> -demethylsekikaic acid      | <i>R. americana</i>                   | [47]             | <i>R. Americana</i>        |
|     |                    |                                          | <i>R. cochlearis</i>                  | [30]             | <i>R. cochlearis</i>       |
|     |                    |                                          | <i>R. farinacea</i>                   | [47]             | <i>R. farinacea</i>        |
|     |                    |                                          | <i>R. peruviana</i>                   | [30,95]          | <i>R. peruviana</i>        |
|     |                    |                                          | <i>R. solediosa</i>                   | [30]             | <i>R. solediosa</i>        |
|     |                    |                                          | <i>R. usnea</i> (races I and II)      | [30]             | <i>R. australiensis</i>    |
| 31  |                    | Evernic acid                             | <i>R. calicaris</i>                   | [9,35]           | <i>R. calicaris</i>        |
|     |                    |                                          | <i>R. commixta</i>                    | [27]             | <i>R. commixta</i>         |
|     |                    |                                          | <i>R. farinacea</i>                   | [24,57]          | <i>R. farinacea</i>        |
|     |                    |                                          | <i>R. mediterranea</i>                | [98]             | <i>R. mediterranea</i>     |
|     |                    |                                          | <i>R. pollinaria</i>                  | [27,59,66,74,75] | <i>R. pollinaria</i>       |
|     |                    |                                          | <i>R. yasudae</i>                     | [47,101]         | <i>R. yasudae</i>          |
| 32  |                    | 4'- <i>O</i> -methylnorhomosekikaic acid | <i>R. cochlearis</i>                  | [30]             | <i>R. cochlearis</i>       |
|     |                    |                                          | <i>R. farinacea</i>                   | [54]             | <i>R. farinacea</i>        |
|     |                    |                                          | <i>R. peruviana</i>                   | [30]             | <i>R. peruviana</i>        |
|     |                    |                                          | <i>R. pusiola</i>                     | [30]             | <i>R. pusiola</i>          |
|     |                    |                                          | <i>R. subcomplanata</i>               | [94]             | <i>R. subcomplanata</i>    |
|     |                    |                                          | <i>R. usnea</i> (races I and II)      | [30]             | <i>R. australiensis</i>    |
| 33  |                    | 4'- <i>O</i> -methylnorsekikaic acid     | <i>R. cochlearis</i>                  | [30]             | <i>R. cochlearis</i>       |
|     |                    |                                          | <i>R. farinacea</i>                   | [47,54]          | <i>R. farinacea</i>        |
|     |                    |                                          | <i>R. usnea</i> (races I and II)      | [30]             | <i>R. australiensis</i>    |
| 34  |                    | 2'- <i>O</i> -methylsekikaic acid        | <i>R. asahinae</i>                    | [25,30,47,102]   | <i>R. asahinae</i>         |

| No. | Class of Compounds | Compounds Name                                    | Source<br>( <i>Ramalina species</i> )  | References | Current Names of Species * |
|-----|--------------------|---------------------------------------------------|----------------------------------------|------------|----------------------------|
|     |                    |                                                   | <i>R. grumosa</i>                      | [30]       | <i>R. grumosa</i>          |
|     |                    |                                                   | <i>R. solediosa</i>                    | [30]       | <i>R. solediosa</i>        |
| 35  |                    | Chloroatranorin                                   | <i>R. siliquosa</i>                    | [16]       | <i>R. siliquosa</i>        |
|     |                    |                                                   | <i>R. stenospora</i>                   | [81]       | <i>R. stenospora</i>       |
|     |                    |                                                   | <i>R. subcomplanata</i>                | [82]       | <i>R. complanata</i>       |
| 36  |                    | Chrytochorophaeic acid                            | <i>R. aspera</i> (race II)             | [30]       | <i>R. aspera</i>           |
|     |                    |                                                   | <i>R. paludosa</i>                     | [72,81]    | <i>R. paludosa</i>         |
| 37  |                    | 4'- <i>O</i> -demethylhomosekikaic acid           | <i>R. peruviana</i>                    | [30]       | <i>R. peruviana</i>        |
|     |                    |                                                   | <i>R. usnea</i> (races I and II)       | [30]       | <i>R. australiensis</i>    |
| 38  |                    | Diffraetaic acid                                  | <i>R. lacera</i>                       | [43]       | <i>R. lacera</i>           |
|     |                    |                                                   | <i>R. subcomplanata</i>                | [43,82]    | <i>R. subcomplanata</i>    |
| 39  |                    | 4- <i>O</i> -demethylbarbatic acid                | <i>R. siliquosa</i> (mycobiont)        | [103]      | <i>R. siliquosa</i>        |
|     |                    |                                                   | <i>R. siliquosa</i> var. <i>Zopfii</i> | [47,51]    | <i>R. siliquosa</i>        |
|     |                    |                                                   | <i>R. subdecepiens</i>                 | [47]       | <i>R. subdecepiens</i>     |
| 40  |                    | Ramalinaic acid                                   | <i>R. americana</i>                    | [47]       | <i>R. americana</i>        |
|     |                    |                                                   | <i>R. farinacea</i>                    | [61]       | <i>R. farinacea</i>        |
| 41  |                    | Gyrophoric acid                                   | <i>R. americana</i>                    | [43]       | <i>R. americana</i>        |
| 42  |                    | Trivaric acid                                     | <i>R. americana</i>                    | [43,104]   | <i>R. americana</i>        |
| 43  |                    | Perlatolic acid                                   | <i>R. stenospora</i>                   | [81]       | <i>R. stenospora</i>       |
| 44  |                    | 4- <i>O</i> -demethylnorhomosekikaic acid         | <i>R. peruviana</i>                    | [30]       | <i>R. peruviana</i>        |
| 45  |                    | 4'- <i>O</i> -methylsekikaic acid                 | <i>R. asahinae</i>                     | [30]       | <i>R. asahinae</i>         |
| 46  |                    | 4'- <i>O</i> -methylpaludolic acid                | <i>R. asahinae</i>                     | [30,102]   | <i>R. asahinae</i>         |
| 47  |                    | 4,4'-di- <i>O</i> - methylcryptochlorophaeic acid | <i>R. asahinae</i>                     | [102]      | <i>R. asahinae</i>         |
| 48  |                    | Boninic acid                                      | <i>R. asahinae</i>                     | [25,26]    | <i>R. asahinae</i>         |
| 49  |                    | Stenosporic acid                                  | <i>R. stenospora</i>                   | [47,81]    | <i>R. stenospora</i>       |
| 50  |                    | 5-Hydroxysekikaic acid                            | <i>R. farinacea</i>                    | [91]       | <i>R. farinacea</i>        |
| 51  |                    | 5-Chlorosekikaic acid                             | <i>R. glaucescens</i>                  | [67]       | <i>R. glaucescens</i>      |
| 52  |                    | Olivetoric acid                                   | <i>R. leiodea</i>                      | [105]      | <i>R. leiodea</i>          |

| No. | Class of Compounds | Compounds Name                                 | Source<br>( <i>Ramalina species</i> ) | References | Current Names of Species * |
|-----|--------------------|------------------------------------------------|---------------------------------------|------------|----------------------------|
| 53  |                    | Paludolic acid                                 | <i>R. paludosa</i>                    | [72]       | <i>R. paludosa</i>         |
| 54  |                    | 4- <i>O</i> -methyl-oxocryptochlorophaeic acid | <i>R. subfraxinea</i>                 | [106]      | <i>R. subfraxinea</i>      |
| 55  |                    | Lecanoric acid                                 | <i>R. lacera</i>                      | [43]       | <i>R. lacera</i>           |
| 56  |                    | Bourgeanic acid                                | <i>R. bourgeana</i>                   | [107,108]  | <i>R. bourgeana</i>        |

\* Updating scientific names validated by Index Fungorum, available at <http://www.indexfungorum.org/names/Names.asp> in May 2014.

**Table S4.** Depsidones reported in the *Ramalina* species of lichenized fungi (Fungi: Ascomycota).

| No. | Class of Compounds | Compounds Name | Source<br>( <i>Ramalina species</i> ) | References  | Current Names of Species * |
|-----|--------------------|----------------|---------------------------------------|-------------|----------------------------|
| 57  | Depsidones         | Salazinic acid | <i>R. anceps</i>                      | [31]        | <i>R. anceps</i>           |
|     |                    |                | <i>R. angustissima</i>                | [27]        | <i>R. subfarinacea</i>     |
|     |                    |                | <i>R. calcarata</i>                   | [30]        | <i>R. calcarata</i>        |
|     |                    |                | <i>R. chilensis</i>                   | [31,43]     | <i>R. chilensis</i>        |
|     |                    |                | <i>R. complanata</i>                  | [29]        | <i>R. complanata</i>       |
|     |                    |                | <i>R. complanata</i> (races I and II) | [30]        | <i>R. complanata</i>       |
|     |                    |                | <i>R. crassa</i>                      | [32,47]     | <i>R. siliquosa</i>        |
|     |                    |                | <i>R. crassa</i> (mycobiont)          | [46]        | <i>R. siliquosa</i>        |
|     |                    |                | <i>R. darwiniana</i>                  | [29]        | <i>R. darwiniana</i>       |
|     |                    |                | <i>R. dendriscoides</i>               | [30]        | <i>R. dendriscoides</i>    |
|     |                    |                | <i>R. farinacea</i>                   | [43,54,109] | <i>R. farinacea</i>        |
|     |                    |                | <i>R. furcellangulida</i>             | [29]        | <i>R. furcellangulida</i>  |
|     |                    |                | <i>R. nervulosa</i>                   | [47]        | <i>R. nervulosa</i>        |
|     |                    |                | <i>R. pacifica</i>                    | [71]        | <i>R. pacifica</i>         |
|     |                    |                | <i>R. peranceps</i>                   | [31]        | <i>R. peranceps</i>        |
|     |                    |                | <i>R. polyforma</i>                   | [29]        | <i>R. polyforma</i>        |
|     |                    |                | <i>R. rectangularis</i>               | [30]        | <i>R. rectangularis</i>    |
|     |                    |                | <i>R. rigida</i>                      | [30]        | <i>R. rigida</i>           |

| No. | Class of Compounds           | Compounds Name | Source<br>( <i>Ramalina species</i> )         | References        | Current Names of Species * |
|-----|------------------------------|----------------|-----------------------------------------------|-------------------|----------------------------|
| 58  | Norstictic acid              |                | <i>R. scopulorum</i>                          | [16,79]           | <i>R. siliquosa</i>        |
|     |                              |                | <i>R. sharpie</i>                             | [31]              | <i>R. sharpie</i>          |
|     |                              |                | <i>R. siliquosa</i>                           | [47]              | <i>R. siliquosa</i>        |
|     |                              |                | <i>R. siliquosa</i> var. <i>crassa</i>        | [47,51]           | <i>R. siliquosa</i>        |
|     |                              |                | <i>R. siliquosa</i> (mycobiont)               | [103]             | <i>R. siliquosa</i>        |
|     |                              |                | <i>R. subbreviscula</i>                       | [96]              | <i>R. subbreviscula</i>    |
|     |                              |                | <i>R. subcomplanata</i>                       | [94]              | <i>R. subcomplanata</i>    |
|     |                              |                | <i>R. subfarinacea</i> var. <i>reagens</i>    | [58]              | <i>R. subfarinacea</i>     |
|     |                              |                | <i>R. subfarinacea</i> var. <i>salazinic</i>  | [58]              | <i>R. subfarinacea</i>     |
|     |                              |                | <i>R. solediosa</i> (races I, II and III)     | [30]              | <i>R. solediosa</i>        |
|     |                              |                | <i>R. subfarinacea</i>                        | [9,33,43,50,69]   | <i>R. subfarinacea</i>     |
|     |                              |                | <i>R. subpollinaria</i> (races I, II and III) | [30]              | <i>R. subpollinaria</i>    |
|     |                              |                | <i>R. yasudae</i>                             | [47,65]           | <i>R. yasudae</i>          |
|     |                              |                | <i>R. yasudae</i> (mycobiont)                 | [46]              | <i>R. yasudae</i>          |
|     |                              |                | <i>R. anceps</i>                              | [30,31]           | <i>R. anceps</i>           |
|     |                              |                | <i>R. angustissima</i>                        | [27]              | <i>R. subfarinacea</i>     |
|     |                              |                | <i>R. arabum</i>                              | [43]              | <i>R. arabum</i>           |
|     |                              |                | <i>R. chilensis</i>                           | [31,43,44]        | <i>R. chilensis</i>        |
|     |                              |                | <i>R. curnowii</i>                            | [32]              | <i>R. cuspidata</i>        |
|     |                              |                | <i>R. cuspidata</i> var. <i>cuspidata</i>     | [51]              | <i>R. cuspidata</i>        |
|     |                              |                | <i>R. cuspidata</i> var. <i>stenoclada</i>    | [51]              | <i>R. cuspidata</i>        |
|     |                              |                | <i>R. farinacea</i>                           | [43,55,58,60,109] | <i>R. farinacea</i>        |
|     | <i>R. gracilis</i> (race II) | [30]           | <i>R. gracilis</i>                            |                   |                            |
|     | <i>R. lacera</i>             | [43]           | <i>R. lacera</i>                              |                   |                            |
|     | <i>R. peranceps</i>          | [47]           | <i>R. peranceps</i>                           |                   |                            |
|     | <i>R. pusiola</i>            | [30]           | <i>R. pusiola</i>                             |                   |                            |
|     | <i>R. sharpii</i>            | [31]           | <i>R. sharpii</i>                             |                   |                            |
|     | <i>R. siliquosa</i>          | [9]            | <i>R. siliquosa</i>                           |                   |                            |
|     | <i>R. stenoclada</i>         | [32]           | <i>R. cuspidata</i>                           |                   |                            |

| No. | Class of Compounds           | Compounds Name | Source<br>( <i>Ramalina species</i> )           | References       | Current Names of Species * |
|-----|------------------------------|----------------|-------------------------------------------------|------------------|----------------------------|
| 59  | Hypoprotocetraric acid       |                | <i>R. subfarinacea</i>                          | [43]             | <i>R. subfarinacea</i>     |
|     |                              |                | <i>R. subfarinacea</i> var. <i>subfarinacea</i> | [110]            | <i>R. subfarinacea</i>     |
|     |                              |                | <i>R. subfarinacea</i> var. <i>reagens</i>      | [110]            | <i>R. subfarinacea</i>     |
|     |                              |                | <i>R. druidarum</i>                             | [32]             | <i>R. siliquosa</i>        |
|     |                              |                | <i>R. cuspidata</i> var. <i>armorica</i>        | [51]             | <i>R. cuspidata</i>        |
|     |                              |                | <i>R. cuspidata</i> var. <i>cuspidata</i>       | [51]             | <i>R. cuspidata</i>        |
|     |                              |                | <i>R. farinacea</i>                             | [109]            | <i>R. farinacea</i>        |
|     |                              |                | <i>R. hypoprotocetraric</i>                     | [47]             | <i>R. farinacea</i>        |
|     |                              |                | <i>R. siliquosa</i>                             | [16,111]         | <i>R. siliquosa</i>        |
| 60  | Scopuloric acid (or stictic) |                | <i>R. siliquosa</i> var. <i>druidarum</i>       | [51]             | <i>R. siliquosa</i>        |
|     |                              |                | <i>R. tumidula</i>                              | [47]             | <i>R. tumidula</i>         |
|     |                              |                | <i>R. combeoides</i>                            | [42]             | <i>R. combeoides</i>       |
|     |                              |                | <i>R. curnowii</i>                              | [32]             | <i>R. cuspidata</i>        |
|     |                              |                | <i>R. cuspidata</i> var. <i>armorica</i>        | [51]             | <i>R. cuspidata</i>        |
|     |                              |                | <i>R. cuspidata</i> var. <i>cuspidata</i>       | [51]             | <i>R. cuspidata</i>        |
|     |                              |                | <i>R. hierrensis</i>                            | [68]             | <i>R. hierrensis</i>       |
|     |                              |                | <i>R. scopulorum</i>                            | [16,27,69,79]    | <i>R. siliquosa</i>        |
|     |                              |                | <i>R. farinacea</i>                             | [9,27,55,58,109] | <i>R. farinacea</i>        |
| 61  | Protocetraric acid           |                | <i>R. lacera</i>                                | [112]            | <i>R. lacera</i>           |
|     |                              |                | <i>R. pacifica</i>                              | [112]            | <i>R. pacifica</i>         |
|     |                              |                | <i>R. siliquosa</i>                             | [16,32]          | <i>R. siliquosa</i>        |
|     |                              |                | <i>R. siliquosa</i> (mycobiont)                 | [3]              | <i>R. siliquosa</i>        |
|     |                              |                | <i>R. siliquosa</i> var. <i>siliquosa</i>       | [30,31]          | <i>R. siliquosa</i>        |
|     |                              |                | <i>R. anceps</i>                                | [30]             | <i>R. anceps</i>           |
| 62  | Connorstictic acid           |                | <i>R. anceps</i>                                | [30]             | <i>R. anceps</i>           |
| 63  | Criptostictic acid           |                | <i>R. cuspidata</i> var. <i>armorica</i>        | [51]             | <i>R. cuspidata</i>        |
|     |                              |                | <i>R. cuspidata</i> var. <i>cuspidata</i>       | [51]             | <i>R. cuspidata</i>        |
| 64  | Peristictic acid             |                | <i>R. cuspidata</i> var. <i>armorica</i>        | [51]             | <i>R. cuspidata</i>        |
| 65  | Conhypoprotocetraric acid    |                | <i>R. siliquosa</i> var. x                      | [51]             | <i>R. siliquosa</i>        |
| 66  | Variolaric acid              |                | <i>R. hierrensis</i>                            | [68]             | <i>R. hierrensis</i>       |

| No. | Class of Compounds | Compounds Name  | Source<br>( <i>Ramalina species</i> ) | References | Current Names of Species * |
|-----|--------------------|-----------------|---------------------------------------|------------|----------------------------|
| 67  |                    | Gangaleodin     | <i>R. hierrensis</i>                  | [68]       | <i>R. hierrensis</i>       |
| 68  |                    | Physodic acid   | <i>R. leiodea</i>                     | [105]      | <i>R. leiodea</i>          |
| 69  |                    | Coquimboic acid | <i>R. tumidula</i>                    | [113]      | <i>R. tumidula</i>         |

\* Updating scientific names validated by Index Fungorum, available at <http://www.indexfungorum.org/names/Names.asp> in May 2014.

**Table S5.** Fatty acids reported in the *Ramalina* species of lichenized fungi (Fungi: Ascomycota).

| No. | Class of Compounds | Compounds Name            | Source<br>( <i>Ramalina species</i> ) | References | Current Names of Species * |
|-----|--------------------|---------------------------|---------------------------------------|------------|----------------------------|
| 70  | Fatty acids        | Oleic acid                | <i>R. lacera</i>                      | [43]       | <i>R. lacera</i>           |
|     |                    |                           | <i>R. celastri</i> (mycobiont)        | [41]       | <i>R. celastri</i>         |
|     |                    |                           | <i>R. yasudae</i>                     | [114]      | <i>R. yasudae</i>          |
| 71  |                    | Palmitic acid             | <i>R. lacera</i>                      | [114]      | <i>R. lacera</i>           |
|     |                    |                           | <i>R. celastri</i> (mycobiont)        | [41]       | <i>R. celastri</i>         |
| 72  |                    | Stearic acid              | <i>R. lacera</i>                      | [43]       | <i>R. lacera</i>           |
|     |                    |                           | <i>R. celastri</i> (mycobiont)        | [41]       | <i>R. celastri</i>         |
|     |                    |                           | <i>R. yasudae</i>                     | [114]      | <i>R. yasudae</i>          |
| 73  |                    | $\alpha$ -Linolenic       | <i>R. celastri</i> (mycobiont)        | [43]       | <i>R. celastri</i>         |
|     |                    |                           | <i>R. yasudae</i>                     | [114]      | <i>R. yasudae</i>          |
| 74  |                    | Linoleic acid             | <i>R. yasudae</i>                     | [114]      | <i>R. yasudae</i>          |
| 75  |                    | Myristic acid             | <i>R. yasudae</i>                     | [114]      | <i>R. yasudae</i>          |
| 76  |                    | Arachidonic acid          | <i>R. yasudae</i>                     | [114]      | <i>R. yasudae</i>          |
| 77  |                    | D-Protolichesterinic acid | <i>R. almquistii</i>                  | [24,115]   | <i>R. almquistii</i>       |
|     |                    |                           | <i>R. roesleri</i>                    | [78]       | <i>R. roesleri</i>         |
| 78  |                    | Nephrosterinic acid       | <i>R. almquistii</i>                  | [24,115]   | <i>R. almquistii</i>       |

\* Updating scientific names validated by Index Fungorum, available at <http://www.indexfungorum.org/names/Names.asp> in May 2014.

**Table S6.** Other compounds—Carotenoids reported in the *Ramalina* species of lichenized fungi (Fungi: Ascomycota).

| No. | Class of Compounds | Compounds Name          | Source<br>( <i>Ramalina</i> species) | References | Current Names of<br>Species * |
|-----|--------------------|-------------------------|--------------------------------------|------------|-------------------------------|
| 79  | Carotenoids        | $\beta$ -Cryptoxanthin  | <i>R. ecklonii</i>                   | [116]      | <i>R. ecklonii</i>            |
|     |                    |                         | <i>R. usnea</i>                      | [116]      | <i>R. australiensis</i>       |
| 80  |                    | Lutein epoxide          | <i>R. ecklonii</i>                   | [116]      | <i>R. ecklonii</i>            |
|     |                    |                         | <i>R. usnea</i>                      | [116]      | <i>R. australiensis</i>       |
| 81  |                    | Violaxanthin            | <i>R. ecklonii</i>                   | [116]      | <i>R. ecklonii</i>            |
| 82  |                    | Auroxanthin             | <i>R. ecklonii</i>                   | [116]      | <i>R. ecklonii</i>            |
|     |                    |                         | <i>R. usnea</i>                      | [116]      | <i>R. australiensis</i>       |
| 83  |                    | Astaxanthin             | <i>R. celastri</i>                   | [117]      | <i>R. celastri</i>            |
|     |                    |                         | <i>R. usnea</i>                      | [116]      | <i>R. australiensis</i>       |
| 84  |                    | Mutatoxanthin           | <i>R. usnea</i>                      | [116]      | <i>R. australiensis</i>       |
| 85  |                    | Lycoxanthin             | <i>R. ecklonii</i>                   | [116]      | <i>R. ecklonii</i>            |
| 86  |                    | Antheroxanthin          | <i>R. ecklonii</i>                   | [116]      | <i>R. ecklonii</i>            |
|     |                    |                         | <i>R. usnea</i>                      | [116]      | <i>R. australiensis</i>       |
| 87  |                    | $\epsilon$ -Caroten     | <i>R. usnea</i>                      | [116]      | <i>R. australiensis</i>       |
| 88  |                    | Zeaxanthin              | <i>R. celastri</i>                   | [117]      | <i>R. celastri</i>            |
| 89  |                    | $\beta$ -Caroten        | <i>R. celastri</i>                   | [117]      | <i>R. celastri</i>            |
| 90  |                    | $\alpha$ -Doradexanthin | <i>R. celastri</i>                   | [117]      | <i>R. celastri</i>            |
| 91  |                    | Lutein                  | <i>R. celastri</i>                   | [117]      | <i>R. celastri</i>            |
|     |                    |                         | <i>R. usnea</i>                      | [116]      | <i>R. australiensis</i>       |
| 92  |                    | Hydroxyechinenone       | <i>R. ecklonii</i>                   | [116]      | <i>R. ecklonii</i>            |
| 93  |                    | Diatoxanthin            | <i>R. ecklonii</i>                   | [116]      | <i>R. ecklonii</i>            |
| 94  |                    | Neoxanthin              | <i>R. ecklonii</i>                   | [116]      | <i>R. ecklonii</i>            |
|     |                    |                         | <i>R. usnea</i>                      | [116]      | <i>R. australiensis</i>       |
| 95  |                    | Rhodoxanthin            | <i>R. ecklonii</i>                   | [116]      | <i>R. ecklonii</i>            |
|     |                    |                         | <i>R. usnea</i>                      | [116]      | <i>R. australiensis</i>       |

\* Updating scientific names validated by Index Fungorum, available at <http://www.indexfungorum.org/names/Names.asp> in May 2014.



**Table S7.** Other compounds—Steroids and terpenoids reported in the *Ramalina* species of lichenized fungi (Fungi: Ascomycota).

| No. | Class of Compounds | Compounds Name                | Source<br>( <i>Ramalina</i> species)    | Refences          | Current Names of<br>Species * |
|-----|--------------------|-------------------------------|-----------------------------------------|-------------------|-------------------------------|
| 96  | Steroids           | $\alpha$ -Sitosterol          | <i>R. africana</i>                      | [24]              | <i>R. africana</i>            |
|     |                    |                               | <i>R. hierrensis</i>                    | [68]              | <i>R. hierrensis</i>          |
| 97  |                    | Brassicasterol                | <i>R. africana</i>                      | [24]              | <i>R. africana</i>            |
|     |                    |                               | <i>R. tingitana</i>                     | [86]              | <i>R. tingitana</i>           |
| 98  |                    | Lichesterol                   | <i>R. africana</i>                      | [24]              | <i>R. africana</i>            |
| 99  |                    | Ergosterol peroxide           | <i>R. hierrensis</i>                    | [68]              | <i>R. hierrensis</i>          |
|     |                    |                               | <i>R. tingitana</i>                     | [86]              | <i>R. tingitana</i>           |
| 100 |                    | Cerevisterol                  | <i>R. hierrensis</i>                    | [68]              | <i>R. hierrensis</i>          |
| 101 | Terpenoids         | Ursolic acid                  | <i>R. hierrensis</i>                    | [68]              | <i>R. hierrensis</i>          |
| 102 |                    | <i>Iso</i> -arborinol acetate | <i>R. hierrensis</i>                    | [68]              | <i>R. hierrensis</i>          |
| 103 |                    | Friedelin                     | <i>R. ecklonii</i>                      | [53]              | <i>R. ecklonii</i>            |
| 104 |                    | (–)-Sandaracopimaric acid     | <i>R. hierrensis</i>                    | [68]              | <i>R. hierrensis</i>          |
| 105 |                    | Ceruchinol                    | <i>R. ceruchis</i> var. <i>tumidula</i> | [118]             | <i>R. ceruchis</i>            |
|     | <i>R. tigrina</i>  |                               | [119]                                   | <i>R. tigrina</i> |                               |

\* Updating scientific names validated by Index Fungorum, available at <http://www.indexfungorum.org/names/Names.asp> in May 2014.

**Table S8.** Other compounds—Lipids and amines reported in the *Ramalina* species of lichenized fungi (Fungi: Ascomycota).

| No. | Class of Compounds     | Compounds Name                                    | Source<br>( <i>Ramalina</i> species)                                 | References         | Current Names of Species * |                    |
|-----|------------------------|---------------------------------------------------|----------------------------------------------------------------------|--------------------|----------------------------|--------------------|
| 106 | Lipids                 | Diacylglyceryl- <i>N,N,N</i> -trimethylhomoserine | <i>R. lacera</i>                                                     | [43]               | <i>R. lacera</i>           |                    |
| 107 |                        | Diacylglyceryltrimethylalanine                    | <i>R. lacera</i>                                                     | [43]               | <i>R. lacera</i>           |                    |
| 108 |                        | Phosphatidylcholine                               | <i>R. lacera</i>                                                     | [43]               | <i>R. lacera</i>           |                    |
| 109 |                        | Phosphatidyletanolamine                           | <i>R. lacera</i>                                                     | [43]               | <i>R. lacera</i>           |                    |
| 110 |                        | Phosphatidylinositol                              | <i>R. lacera</i>                                                     | [43]               | <i>R. lacera</i>           |                    |
| 111 |                        | Phosphatidic acid                                 | <i>R. lacera</i>                                                     | [43]               | <i>R. lacera</i>           |                    |
| 112 |                        | Sulfoquinovosyldiacylglycerol                     | <i>R. lacera</i>                                                     | [43]               | <i>R. lacera</i>           |                    |
| 113 |                        | Monogalactosyldiacylglycerol                      | <i>R. celastri</i>                                                   | [120]              | <i>R. celastri</i>         |                    |
|     |                        |                                                   | <i>R. lacera</i>                                                     | [43]               | <i>R. lacera</i>           |                    |
| 114 |                        | Gigalactosyldiacylglycerol                        | <i>R. celastri</i>                                                   | [120]              | <i>R. celastri</i>         |                    |
|     |                        |                                                   | <i>R. lacera</i>                                                     | [43]               | <i>R. lacera</i>           |                    |
| 115 |                        |                                                   | <i>O</i> - $\beta$ -D-Galactopyranosyl-(1 $\rightarrow$ 1')-ceramide | <i>R. celastri</i> | [121]                      | <i>R. celastri</i> |
| 116 |                        | Amines                                            | Choline                                                              | <i>R. fraxinea</i> | [14]                       | <i>R. fraxinea</i> |
| 117 | Betaine                |                                                   | <i>R. fraxinea</i>                                                   | [14]               | <i>R. fraxinea</i>         |                    |
| 118 | Histamine              |                                                   | <i>R. fraxinea</i>                                                   | [14]               | <i>R. fraxinea</i>         |                    |
| 119 | Acetylcholine          |                                                   | <i>R. fraxinea</i>                                                   | [14]               | <i>R. fraxinea</i>         |                    |
| 120 | $\beta$ -Fenethylamine |                                                   | <i>R. fraxinea</i>                                                   | [14]               | <i>R. fraxinea</i>         |                    |
| 121 | Spermidine             |                                                   | <i>R. farinacea</i>                                                  | [122]              | <i>R. farinacea</i>        |                    |
| 122 | Putrescine             |                                                   | <i>R. farinacea</i>                                                  | [123,124]          | <i>R. farinacea</i>        |                    |
| 123 | Spermine               |                                                   | <i>R. calicaris</i>                                                  | [124]              | <i>R. calicaris</i>        |                    |

\* Updating scientific names validated by Index Fungorum, available at <http://www.indexfungorum.org/names/Names.asp> in May 2014.

**Table S9.** Other compounds—Amino acids reported in the *Ramalina* species of lichenized fungi (Fungi: Ascomycota).

| No. | Class of Compounds | Compounds Name              | Source<br>( <i>Ramalina</i> species) | References | Current Names of<br>Species * |
|-----|--------------------|-----------------------------|--------------------------------------|------------|-------------------------------|
| 124 | Amino acids        | Glutamic acid               | <i>R. celastri</i> (photobiont)      | [4]        | <i>R. celastri</i>            |
|     |                    |                             | <i>R. fraxinea</i>                   | [14]       | <i>R. fraxinea</i>            |
|     |                    |                             | <i>R. siliquosa</i>                  | [125]      | <i>R. siliquosa</i>           |
| 125 |                    | Aspartic acid               | <i>R. celastri</i> (photobiont)      | [4]        | <i>R. celastri</i>            |
|     |                    |                             | <i>R. fraxinea</i>                   | [14]       | <i>R. fraxinea</i>            |
|     |                    |                             | <i>R. siliquosa</i>                  | [125]      | <i>R. siliquosa</i>           |
| 126 |                    | Alanine                     | <i>R. celastri</i> (photobiont)      | [4]        | <i>R. celastri</i>            |
|     |                    |                             | <i>R. fraxinea</i>                   | [14]       | <i>R. fraxinea</i>            |
|     |                    |                             | <i>R. siliquosa</i>                  | [125]      | <i>R. siliquosa</i>           |
|     |                    |                             | <i>R. sinensis</i>                   | [126]      | <i>R. sinensis</i>            |
| 127 |                    | Serine                      | <i>R. fraxinea</i>                   | [14]       | <i>R. fraxinea</i>            |
|     |                    |                             | <i>R. siliquosa</i>                  | [125]      | <i>R. siliquosa</i>           |
| 128 |                    | Proline                     | <i>R. fraxinea</i>                   | [14]       | <i>R. fraxinea</i>            |
|     |                    |                             | <i>R. siliquosa</i>                  | [125]      | <i>R. siliquosa</i>           |
| 129 |                    | Arginine                    | <i>R. celastri</i> (photobiont)      | [4]        | <i>R. celastri</i>            |
|     |                    |                             | <i>R. siliquosa</i>                  | [125]      | <i>R. siliquosa</i>           |
| 130 |                    | Glycine                     | <i>R. celastri</i> (photobiont)      | [4]        | <i>R. celastri</i>            |
|     |                    |                             | <i>R. siliquosa</i>                  | [125]      | <i>R. siliquosa</i>           |
| 131 |                    | Lysine                      | <i>R. celastri</i> (photobiont)      | [4]        | <i>R. celastri</i>            |
|     |                    |                             | <i>R. siliquosa</i>                  | [125]      | <i>R. siliquosa</i>           |
| 132 |                    | Leucine                     | <i>R. celastri</i> (photobiont)      | [4]        | <i>R. celastri</i>            |
|     |                    |                             | <i>R. siliquosa</i>                  | [125]      | <i>R. siliquosa</i>           |
| 133 |                    | Threonine                   | <i>R. celastri</i> (photobiont)      | [4]        | <i>R. celastri</i>            |
|     |                    |                             | <i>R. siliquosa</i>                  | [125]      | <i>R. siliquosa</i>           |
| 134 |                    | Glucosamine                 | <i>R. siliquosa</i>                  | [125]      | <i>R. siliquosa</i>           |
| 135 |                    | $\gamma$ -Aminobutyric acid | <i>R. fraxinea</i>                   | [14]       | <i>R. fraxinea</i>            |
| 136 |                    | Taurine                     | <i>R. crassa</i>                     | [127]      | <i>R. siliquosa</i>           |

\* Updating scientific names validated by Index Fungorum, available at <http://www.indexfungorum.org/names/Names.asp> in May 2014.

**Table S10.** Other compounds reported in the *Ramalina* species of lichenized fungi (Fungi: Ascomycota).

| No. | Class of Compounds             | Compounds Name                                       | Source<br>( <i>Ramalina</i> species) | References      | Current Names of<br>Species * |
|-----|--------------------------------|------------------------------------------------------|--------------------------------------|-----------------|-------------------------------|
| 137 | Hidrazide                      | Ramalin                                              | <i>R. terebrata</i>                  | [83,85,128–130] | <i>R. terebrata</i>           |
| 138 | Cyclic peptide                 | Stereocalpin A                                       | <i>R. terebrata</i>                  | [131–133]       | <i>R. terebrata</i>           |
| 139 | Phenolics compounds            | 2,3-Dihydroxy-4-methoxy-6-pentyl-phenylmethyl ester  | <i>R. farinacea</i>                  | [91]            | <i>R. farinacea</i>           |
| 140 |                                | Divaric acid                                         | <i>R. africana</i>                   | [24]            | <i>R. africana</i>            |
| 141 | Organics acids and derivatives | Ethyl divaricatinatinate                             | <i>R. africana</i>                   | [24]            | <i>R. africana</i>            |
| 142 |                                | 2-Hydroxy-4-methoxy-6-propyl benzoic acid            | <i>R. roesleri</i>                   | [78]            | <i>R. roesleri</i>            |
| 143 |                                | 2,4-Dihydroxy-3,6-dimethyl-methyl ester benzoic acid | <i>R. roesleri</i>                   | [78]            | <i>R. roesleri</i>            |
| 144 |                                | Isorhizonic acid                                     | <i>R. dilacerata</i>                 | [134]           | <i>R. dilacerate</i>          |
| 145 |                                | $\alpha$ -Crotonic acid                              | <i>R. reticulata</i>                 | [15]            | <i>R. menziesii</i>           |
| 146 |                                | Abscisic acid                                        | <i>R. farinacea</i>                  | [123]           | <i>R. farinacea</i>           |
| 147 |                                | Ethyl caprilate                                      | <i>R. fastigiata</i>                 | [135]           | <i>R. fastigiata</i>          |
| 148 |                                | Ethyl palmitate                                      | <i>R. fastigiata</i>                 | [135]           | <i>R. fastigiata</i>          |
| 149 |                                | Ethyl stearate                                       | <i>R. fastigiata</i>                 | [135]           | <i>R. fastigiata</i>          |
| 150 | Benzopyran                     | Divaricat acid                                       | <i>R. hierrensis</i>                 | [68]            | <i>R. hierrensis</i>          |
| 151 | Anthraquinone                  | Parientin                                            | <i>R. hierrensis</i>                 | [68]            | <i>R. hierrensis</i>          |
| 152 | Hydrocarbon                    | Aspicilin                                            | <i>R. ecklonii</i>                   | [34]            | <i>R. ecklonii</i>            |
| 153 |                                | Ethylene                                             | <i>R. lacera</i>                     | [47]            | <i>R. lacera</i>              |

\* Updating scientific names validated by Index Fungorum, available at <http://www.indexfungorum.org/names/Names.asp> in May 2014.

## References

1. Miceno, A.M.; Gorin, P.A.J.; Iacomini, M. Galactomannan and isolichenan components of the carbohydrate-rich lichen *Ramalina ecklonii* (Spreng.) Mey. & Flot. *Agric. Biol. Chem.* **1991**, *55*, 1391–1392.
2. Teixeira, A.Z.A.; Iacomini, M.; Gorin, A.J. An unusual glucomannan from *Tornabenia intricata*. *Phytochemistry* **1992**, *31*, 3467–3470.
3. Stuelp, P.M.; Carneiro Leão, A.M.A.; Gorin, P.A.J.; Iacomini, M. The glucans of *Ramalina celastri*; relation with chemotypes of other lichens. *Carbohydr. Polym.* **1999**, *40*, 101–106.
4. Cordeiro, L.M.C.; Reis, R.A.; Tisher, C.A.; Gorin, P.A.J.; Ferreira, J.C.; Iacomini, M. Linear  $\beta$ -mannose containing polysaccharide,  $\beta$ -xylan, and amylose from the cultured photobiont *Trebouxia* sp. of the ascolichen *Ramalina celastri*. *FEMS Microbiol. Lett.* **2003**, *220*, 89–94.
5. Cordeiro, L.M.C.; Stocker-Wörgötter, E.; Gorin, P.A.J.; Iacomini, M. Elucidation of polysaccharide origin in *Ramalina peruviana* symbiosis. *FEMS Microbiol. Lett.* **2004**, *238*, 79–84.
6. Teixeira, A.Z.A.; Iacomini, M.; Gorin, P.A.J. Chemotypes of mannose-containing polysaccharides of lichens mycobionts: A possible aid in classification and identification. *Carbohydr. Res.* **1995**, *266*, 309–314.
7. Cordeiro, L.M.C.; Stocker-Wörgötter, E.; Gorin, P.A.J.; Iacomini, M. Comparative studies of the polysaccharides from species of the genus *Ramalina*-lichenized fungi-of three distinct habitats. *Phytochemistry* **2003**, *63*, 967–975.
8. Cordeiro, L.M.C.; Carbonero, E.R.; Sasaki, G.L.; Reis, R.A.; Stocker-Wörgötter, E.; Gorin, P.A.J.; Iacomini, M. A fungus-type  $\beta$ -galactofuranan in the cultivated *Trebouxia* photobiont of the lichen *Ramalina gracilis*. *FEMS Microbiol. Lett.* **2005**, *244*, 193–198.
9. Solberg, Y.J. Dyeing of wool with lichens and lichen substances. *Acta Chem. Scand.* **1956**, *10*, 1116–1123.
10. Gorin, P.A.J.; Iacomini, M. Polysaccharides of the lichens *Cetraria islandica* and *Ramalina usnea*. *Carbohydr. Res.* **1984**, *128*, 119–132.
11. Gorin, P.A.J.; Iacomini, M. Structural diversity of D-galacto-D-mannan components isolated from lichens having ascomycetous mycobionts. *Carbohydr. Res.* **1985**, *142*, 253–267.
12. Takahashi, K.; Takeda, T.; Shibata, S. Polysaccharides of lichen symbionts. *Chem. Pharm. Bull.* **1979**, *27*, 238–241.
13. Mamut, R.; Tursun, T.; Abbas, A. Analysis monosaccharide of the polysaccharide in *Ramalina sinensis* with HPLC. *Shipin Gongye* **2013**, *34*, 209–211.
14. Krzacek, T.; Smolarz, H. Chemical composition of *Ramalina fraxinea* (L.) Ach. Thallus. *Acta Soc. Bot. Pol.* **1979**, *48*, 27–34.
15. Stark, J.B.; Walter, E.D.; Owens, H.S. Method of isolation of usnic acid from *Ramalina reticulata*. *J. Am. Chem. Soc.* **1950**, *72*, 1819–1820.
16. Culberson, C.F. Some constituents of the lichen *Ramalina siliquosa*. *Phytochemistry* **1965**, *4*, 951–961.

17. Mittal, O.P.; Neelakantan, S.; Seshadri, T.R. Chemical investigation of Indian lichens. XIV. Chemical components of *Ramalina calicaris* and *Ramalina sinensis*. *J. Sci. Ind. Res. India* **1952**, *11B*, 386–387.
18. Seshadri, T.R.; Subramanian, S.S. Indian lichens. VIII. Lichens growing on sandal trees. *Proc.-Indian Acad. Sci., Sect. A* **1949**, *30A*, 15–22.
19. Kosugi, M.; Miyake, H.; Yamakawa, H.; Shibata, Y.; Miyazawa, A.; Sugimura, T.; Satoh, K.; Itoh, S.; Kashino, Y. Arabitol provided by lichenous fungi enhances ability to dissipate excess light energy in a symbiotic green alga under desiccation. *Plant Cell Physiol.* **2013**, *54*, 1316–1325.
20. Ashina, Y.; Yanagita, M. Lichen substances. XXXIX. A new lichen acid, norstictinic acid, and the occurrence of D-arabitol in lichens. *Ber. Dtsch. Chem. Ges. B* **1934**, *67B*, 799–803.
21. Cordeiro, L.M.C.; Messias, D.; Sasaki, G.L.; Gorin, P.A.J.; Iacomini, M. Does aposymbiotically cultivated fungus *Ramalina* produce isolichenan? *FEMS Microbiol. Lett.* **2011**, *321*, 50–57.
22. McAvoy, K.; Igartuburu, J.M.; Romgni-Colvin, J. Polysaccharide composition of *Ramalina terebrata*. *Abstr. Pap. Am. Chem. Soc.* **2012**, *1*, 25–29.
23. Komiya, T.; Shibata, S. Polyols produced by the cultured phyco- and mycobionts of some *Ramalina* species. *Phytochemistry* **1971**, *10*, 695–699.
24. Shukla, V.; Negi, S.; Rawat, M.S.M.; Pant, G.; Nagatsu, A. Chemical study of *Ramalina africana* (Ramalinaceae) from the Garhwal Himalayas. *Biochem. Syst. Ecol.* **2004**, *32*, 449–453.
25. Islas, N.V.; Zambrano, A.; Rojas, J.L. Ozone Reactivity and Free Radical Scavenging Behavior of Phenolic Secondary Metabolites in Lichens Exposed to Chronic Oxidant Air Pollution from Mexico City. *J. Chem. Ecol.* **2007**, *33*, 1619–1634.
26. Asahina, Y.; Kusaka, T. Lichen substances. LXXXIII. A new depside, boninic acid; synthesis of boninic acid and of homosekikaic acid. *Ber. Dtsch. Chem. Ges. B* **1937**, *70B*, 1815–1821.
27. Asahina, Y.; Shibata, S. *Chemistry of Lichen Substances, A*; Asher & Co. Ltd: Vaals–Amsterdam, The Netherlands, 1971.
28. Huneck, S.; Trotted, G. Lichen constituents. XXXIV. Structure and composition of *Ramalina boulhautiana*. *Z. Naturforschung B* **1966**, *21*, 904–904.
29. Aptroot, A.; Bungartz, F. The lichen genus *Ramalina* on the Galapagos. *Lichenologist* **2007**, *39*, 519–542.
30. Kashiwadani, H.; Kalb, K. The genus *Ramalina* in Brazil. *Lichenologist* **1993**, *25*, 1–31.
31. Rundel, P.W. Evolution relationships in the *Ramalina usnea* complex. *Lichenologist* **1978**, *10*, 141–156.
32. Culberson, W.L. Analysis of chemical and morphological variation in the *Ramalina siliquosa* species complex. *Brittonia* **1967**, *19*, 333–352.
33. Marshak, A.; Barry, G.T.; Craig, L.C. Antibiotic compound isolated from the lichen *Ramalina reticulate*. *Science* **1947**, *24*, 394–395.
34. Huneck, S.; Follmann, G. Lichen constituents. XXXVI. Chemistry of Chilean lichens. 15. Constituents of *Ramalina cactacearum*, var. *ambigua*, and *Medusulina chilena*. *Z. Naturforschung B* **1967**, *22*, 110–111.
35. Asahina, Y.; Fukuziro, F. Lichen substances. III. Constitution of obtusatic acid. *Ber. Dtsch. Chem. Ges. B* **1932**, *65B*, 580–583.

36. Wade, A.E. The Genus *Ramalina* in the British Isles. *Lichenologist* **1961**, *5*, 226–241.
37. Cansaran, D.; Atakol, O.; Halici, M.G.; Aksoy, A. HPLC analysis of usnic acid in some *Ramalina* species from Anatolia and investigation of their antimicrobial activities. *Pharm. Biol.* **2007**, *45*, 77–81.
38. Popiolek, Z. Content of lichen substances in some species of *Ramalina*. *Ann. Univ. Mariae Curie-Sklodowska Sect. C* **1967**, *22*, 165–168.
39. Fazio, A.T.; Adler, M.T.; Bertoni, M.D.; Sepúlveda, C.S.; Damonte, E.B.; Maier, M.S. Lichen secondary metabolites from the cultured lichen mycobionts of *Teloschistes chrysophthalmus* and *Ramalina celastri* and their antiviral activities. *Z. Naturforschung C* **2007**, *62*, 543–549.
40. Ramesh, P.; Baig, E.S.A. Chemical investigation of south Indian lichens: *Ramalina* species. *Indian Drugs* **1994**, *31*, 445–446.
41. Fazio, A.T.; Adler, M.; Maier, M.S. Usnic acid and triacylglycerides production by the cultured lichen mycobiont of *Ramalina celastri*. *Nat. Prod. Commun.* **2014**, *9*, 213–214.
42. Bendz, G.; Santesson, J.; Wachtmeister, C.A. Studies on the chemistry of lichens. *Acta Chem. Scand.* **1965**, *19*, 1185–1187.
43. Hanus, L.O.; Temina, M.; Dembitsky, V. Biodiversity of the chemical constituents in the epiphytic lichenized ascomycete *Ramalina lacera* grown on difference substrates *Crataegus sinaicus*, *Pinus halepensis*, and *Quercus calliprinos*. *Biomed. Pap.* **2008**, *152*, 203–208.
44. Huneck, S.; Tretted, G. Lichen constituents. XX. Chemistry of Chilean lichens. 8. Componets of *Ramalina chilensis*. *Z. Naturforschung B* **1966**, *21*, 90–91.
45. Praven Kumar, S.V.; Kekuda, T.R.P.; Vinayaka, K.S.; Sudharshan, S.J. Anthelmintic and antioxidant efficacy of two macrolichens of Ramalinaceae. *Pharmacogn. J.* **2009**, *1*, 238–242.
46. Komiya, T.; Shibata, S. Formation of lichen substances by mycobionts of lichens. Isolation of (+)-usnic acid and salazinic acid from mycobionts of *Ramalina* sp. *Chem. Pharm. Bull.* **1969**, *17*, 1305–1306.
47. Huneck, S.; Yoshimura, I. *Identification of Lichen Substances*; Springer-Verlag: Berlin, Germany, 1996.
48. Bézivin, C.; Tomasi, S.; Lohézic-Le, F.; Boustie, J. Cytotoxic activity of some lichen extracts on murine and human cancer cell lines. *Phytomedicine* **2003**, *10*, 499–503.
49. Ryan, H.; O’Riordan, W.M. Tinctorial constituents of some lichens, which are used as dyes in Ireland. *Proc. R. Irish Acad. B* **1917**, *33*, 91–104.
50. Salkowski, H. Circular polarization of usnic acids and other lichen substances. *Liebigs Ann. Chem.* **1911**, *377*, 123–126.
51. Parrot, D.; Jan, S.; Baert, N.; Guyot, S.; Tomasi, S. Comparative metabolite profiling and chemical study of *Ramalina siliquosa* complex using LC-ESI-MS/MS approach. *Phytochemistry* **2013**, *89*, 114–124.
52. Nakao, M. Chemical constituents of a Chinese drug “shi-hoa” and their constitutions. *Yakuga Zasshi* **1923**, *496*, 423–497.
53. Reyes, Q.A.; Vicuna, L.P.; Almonacid, V.J. Usnic acid and atranorin in some regional lichens. *Rev. Latinoam. Quim.* **1981**, *12*, 130–131.
54. Molho, L.; Bodo, B.; Molho, D. L’acide *O*-méthyl-4’ norsékikaïque, nouveau metadepside isole d’un lichen du genre *Ramalina*. *Phytochemistry* **1979**, *18*, 2049–2051.

55. Tay, T.; Türk, A.Ö.; Yilmaz, M.; Türk, H.; Kivanç, M. Evaluation of the antimicrobial activity of the acetone extract of the lichen *Ramalina farinacea* and its (+)-usnic acid, norstictic acid, and protocetraric acid constituents. *Z. Naturforschung C* **2004**, *59*, 384–388.
56. Esimone, C.O.; Adikwu, M.U. Antimicrobial activity and cytotoxicity of *Ramalina farinacea*. *Fitoterapia* **1999**, *70*, 428–431.
57. Rao, P.S.; Shripathy, V. Chemical constituents of *Umbilicaria indica* Frey and *Ramalina farinacea* L. *Ach. Curr. Sci.* **1976**, *45*, 517–518.
58. Hawksworth, D.L. Typification of lichen farinaceous. *Bryologist* **1969**, *72*, 254–255.
59. Zopf, W. To the knowledge of the lichen material. *Liebigs Ann.* **1897**, *297*, 271–312.
60. Rangaswami, S.; Rao, V.S. Chemical components of *Ramalina farinacea*. *Indian J. Pharm.* **1954**, *16*, 197–199.
61. Hesse, O. Contribution for the knowledge of the lichens and their characteristic components. *J. Prakt. Chem.* **1903**, *68*, 1–71.
62. Koparal, A.T.; Tuylu, B.A.; Turk, H. In vitro cytotoxic activities of (+)-usnic acid and (–)-usnic acid on V79, A549, and human lymphocyte cells and their non-genotoxicity on human lymphocytes. *Nat. Prod. Res.* **2006**, *20*, 1300–1307.
63. Zopf, W. To the knowledge of the lichen substances. *Liebigs Ann. Chem.* **1905**, *340*, 276–309.
64. Briner, G.P.; Gream, G.E.; Riggs, N.V. Chemistry of Australian lichens. I. Some constituents of *Parmelia conspersa*, *Ramalina fraxinea*, *Usnea barbata*, and *Usnea ceratina* from the New England region. *Aust. J. Chem.* **1960**, *13*, 277–284.
65. Yamamoto, Y.; Mizuguchi, R.; Yamada, Y. Tissue cultures of *Usnea rubescens* and *Ramalina yasudae* and production of usnic acid in their cultures. *Agric. Biol. Chem.* **1985**, *49*, 3347–3348.
66. Asahina, Y.; Nonomura, S. Lichen substances. XVI. Constituents of *Ramalina* species with special reference to sekikaic acid. *Ber. Dtsch. Chem. Ges. B* **1933**, *66B*, 30–35.
67. Dias, D.A.; Urban, S. Phytochemical investigation of the Australian lichens *Ramalina glaucescens* and *Xanthoria parietina*. *Nat. Prod. Commun.* **2009**, *4*, 959–964.
68. Gonzalez, A.G.; Barrera, J.B.; Rodriguez, E.M.P.; Padron, C.E.H. Chemical constituents of the lichen *Ramalina hierrensis*. *Planta Med.* **1992**, *58*, 214–218.
69. Zopf, W. A contribution to the knowledge of the lichen constituents. *Liebigs Ann. Chem.* **1907**, *352*, 1–44.
70. Hauck, M.; Willenbruch, K.; Leuschner, C. Lichen substances prevent lichens from nutrient deficiency. *J. Chem. Ecol.* **2009**, *35*, 71–73.
71. Verma, N.; Behera, B.C.; Joshi, A. Studies on nutritional requirement for the culture of lichen *Ramalina nervulosa* and *Ramalina pacifica* to enhance the production of antioxidant metabolites. *Folia Microbiol.* **2012**, *57*, 107–114.
72. Culberson C.F. Chemical constituents of *Ramalina paludosa*. *Bryologist* **1967**, *70*, 397–405.
73. Urdapilleta, A.A.A. Atividade de Substâncias Isoladas de Líquens Sobre Formas Promastigotas de *Leishmania (L.) amazonensis* e *Leishmania (V.) braziliensis*. Master's Thesis, Universidade de Brasília, Brasília-DF, 3 March 2006.
74. Morozova, O.V.; Dargaeva, T.D.; Brutko, L.I. Components of *Ramalina pollinaria*. *Khim. Prirod. Soed.* **1984**, *20*, 252–253.



75. Koller, G. Ramalic acid. *Monatsh. Chem.* **1932**, *61*, 286–292.
76. Kirk, P.M.; Cannon, P.F.; Minter, D.W.; Stalpers, J.A. *Dictionary of the Fungi*; CABI—Europe-UK, Cromwell Press: Trowbridge, UK, 2008.
77. Marshak, A.G. Extracting Usnic Acid. US 2557987 A, 26 June 1951.
78. Sisodia, R.; Geol, M.; Verma, S.; Rani, A.; Dureja, P. Antibacterial and antioxidante activity of lichen species *Ramalina roesleri*. *Nat. Prod. Res.* **2013**, *27*, 2235–2239.
79. Curd, F.H.; Robertson, A. Lichen acids. Part VI. Constituensts of *Ramalina scopulorum*. *J. Chem. Soc.* **1935**, *329*, 1379–1381.
80. Tugunay, T.; Reyim, M.; Adilijiang, A.A. Content determination and antioxidant activity evaluation of usnic acid in *Ramalina sinensis* Jatta. *Shipin Kexue* **2010**, *31*, 150–152.
81. Culberson, C.F. Stenosporic acid, a new depside in *Ramalina stenospora*. *Phytochemistry* **1970**, *9*, 841–844.
82. Kumar, K.C.S.; Banskota, A.H.; Manandhar, M.D. Chemical constituents and antibacterial activity of *Ramalina subcomplanata*. *J. Nepal Chem. Soc.* **1995**, *14*, 28–35.
83. Yim, J.H.; Lee, H.K.; Bhattarai, H.D.; Babita, P.; Kim, I.C.; Hong, S.G.; Kim, D.K.; Lee, Y.K.; Gu, S.; Oh, H.C. Antioxidant Activities of Ramalin Isolated from *Ramalina terebrata* Extracts. WO 2010053327 A2, 14 May 2010.
84. Huneck, S.; Follmann, G. The presence of usnic acid in *Lecanora melanophthalma* and *Ramalina terebrata*. *Naturwissenschaften* **1964**, *51*, 291–292.
85. Paudel, B.; Bhattarai, H.D.; Lee, H.K.; Oh, H.; Shin, H.W.; Han, J.; Yim, J.H. Antibacterial activities of ramalin, usnic acid and its tree derivatives isolated from the Antarctic lichen *Ramalina terebrata*. *Z. Naturforschung C* **2010**, *65*, 34–38.
86. Gonzalez, A.G.; Martin, J.D.; Martin, M.M. Chemical components of lichens. II. *Ramalina tingitana*. *Anal. Quim.* **1973**, *69*, 807–809.
87. Imshaug, H.A. Typification of *Ramalina usnea* (L.) R. H. Howe. *Lichenologist* **1972**, *5*, 317–318.
88. Lee, S.G.; Koh, H.Y.; Oh, H.; Han, S.J.; Kim, I.C.; Lee, H.K.; Yim, J.H. Human dermal fibroblast proliferation activity of usimine-C from Antarctic lichen *Ramalina terebrata*. *Biotechnol. Lett.* **2010**, *32*, 471–475.
89. Yim, J.H.; Kim, I.C.; Lee, S.G.; Kim, D.K.; Han, S.J.; Lee, H.S.; Seok, K.H.; Kim, S.J.; Kim, T.K.; Kang, P.S.; *et al.* Pharmaceutical Composition for the Treatment of Inflammatory Disease or Immune Disease Containing Ramalin. WO 2011152671 A2, 8 December 2011.
90. Luo, H.; Wei, X.; Yamamoto, Y.; Liu, Y.; Wang, L.; Jung, J.S.; Koh, Y.J.; Hur, J.-S. Antioxidant activities of edible lichen *Ramalina conduplicans* and its free radical scavenging constituents. *Mycoscience* **2010**, *51*, 391–395.
91. Lai, D.; Odimewu, D.; Esimone, C.; Grunwald, T.; Proksch, P. Phenolic compounds with *in vitro* activity against respiratory syncytial from the Nigerian lichen *Ramalina farinacea*. *Planta Med.* **2013**, *79*, 1440–1446.
92. Vinayaka, K.S.; Kekuda, T.R.P.; Swathi, D.; Praveen Kumar, S.V. Studies on chemical composition and *in vitro* antibacterial activity of solvent extracts of the lichen *Ramalina hossei* Vain. *BioTechnol. Indian J.* **2009**, *3*, 309–311.
93. Molho, D.; Bodo, B.; Culberson, W.L. A chemically distinctive new *Ramalina* from Fiji. *Bryologist* **1981**, *84*, 396–398.

94. Hamada, N. Individual variation in the contents of lichen substances in *Ramalina nervulosa* and *Ramalina subcomplanata*. *Bryologist* **1988**, *91*, 95–97.
95. Cordeiro, L.M.C.; Iacomini, M.; Stocker-Wörgötter, E. Culture studies and secondary compounds of six *Ramalina* species. *Mycol. Res.* **2004**, *108*, 489–497.
96. Hamada, N. The effect of temperature on lichen substances in *Ramalina subbreviscula* (Lichens). *Bot. Mag.* **1983**, *96*, 121–126.
97. Asahina, Y.; Kusaka, T. Lichen substances. LXV. A new depside, ramalinolic acid. *Ber. Dtsch. Chem. Ges. B* **1936**, *69B*, 450–455.
98. Huneck, S. Lichen constituents. LXXXIX. Secondary substances of some lichens. *Phytochemistry* **1972**, *11*, 1493–1495.
99. Bendz, G.; Santesson, J.; Wachtmeister, C.A. Chemistry of lichens. XXI. Isolation and synthesis of methyl 3,5-dichlorolecanorate, a new depside from *Ramalina* spp. *Acta Chem. Scand.* **1965**, *19*, 1188–1190.
100. Huneck, S. Lichen constituents. XXXIV. Structure of tumidulin, a new chlorine containing depside. *Chem. Ber.* **1966**, *99*, 1106–1110.
101. Ingólfssdóttir, K. Usnic acid. *Phytochemistry* **2002**, *61*, 729–736.
102. Chester, D.O.; Elix, J.A. The identification of four new meta-depsides in the lichen *Ramalina asahinae*. *Aust. J. Chem.* **1978**, *31*, 2745–2749.
103. Hamada, N.; Ueno, T. Depside from an isolated lichen mycobiont. *Agric. Biol. Chem.* **1987**, *51*, 1705–1706.
104. Culberson, C.F.; LaGreca, S.; Johnson, A.; Culberson, W.L. Trivaric acid, a new tridepside in the *Ramalina americana* chemotype complex (lichenized Ascomycota: Ramalinaceae). *Bryologist* **2000**, *102*, 595–601.
105. Elix, J.A.; Peculiarities of the Australasian lichen flora: Accessory metabolites, chemical and hybrid strains. *J. Hattori Bot. Lab.* **1982**, *52*, 407–415.
106. Culberson, C.F.; Culberson, W.L.; Johnson, A. A novel meta-depside from the *Ramalina subfraxinea* complex (Ascomycotina, Ramalinaceae). *Bryologist* **1990**, *93*, 193–196.
107. Bodo, B.; Hebrard, P.; Molho, L.; Molho, D. Desmaziera evernioides and *Ramalina bourgeana*. *Tetraedron Lett.* **1973**, *18*, 1631–1634.
108. Bodo, B. Bourgeanic acid: A new metabolite of lichens. Structure, synthesis and biosynthesis. *Bull. Mus. Natl. Hist. Nat. Sci. Phys.-Chim.* **1975**, *3*, 23–97.
109. Stocker-Worgötter E.; Elix, J.A.; Grube, M. Secondary chemistry of lichen forming fungi: Chemosyndromic variation and DNA analyses of cultures and chemotypes in the *Ramalina farinacea*. *Bryologist* **2004**, *107*, 152–162.
110. Hawksworth, D.L. Chemical strains of the lichen *Ramalina subfariancacea*. *Bot. Notiser* **1968**, *121*, 317–320.
111. Culberson, C.F. Microchemical tests for the lichen depsidone hypoprotocetraric acid. *Bryologist* **1965**, *68*, 301–304.
112. Stuelp-Campelo, P.Ma.; de Oliveira, M.B.M.; Leão, A.M.A.C.; Carbonero, E.R.; Gorin, P.A.J.; Iacomini, M. Effect of a soluble  $\alpha$ -D-glucan from the lichenized fungus *Ramalina celsastri* on macrophage activity. *Int. Immunopharmacol.* **2002**, *2*, 691–698.

113. Huneck, S.; Lehn, J.M. Lichen constituents. XXVII. Identity between coquimboic acid and hypoprotocetraric acid. *Z. Naturforschung B* **1966**, *21*, 299–299.
114. Yamamoto Y.; Watanabe, A. Fatty acid composition of lichens and their phyco and mycobionts. *J. Gen. Appl. Microbiol.* **1974**, *20*, 83–86.
115. Hirayama, T.; Fujikawa, F.; Kasahara, T.; Otsuka, M.; Nishida, N.; Mizuno, D. Anti-tumor activities of some lichen products and their degradation products. *Yakugaku Zasshi* **1980**, *100*, 755–759.
116. Czczuga, B.; de Corona, L.F. Carotenoids in lichens from Argentina. *Biochem. Syst. Ecol.* **1987**, *15*, 519–522.
117. Dembitsky, V.M. Lipids of lichens. *Prog. Lipid Res.* **1992**, *31*, 373–397.
118. Lehn, J.M.; Huneck, S. Lichen constituents. XVIII. First separation of the diterpene (–)-16- $\alpha$ -hydroxykaurane from a lichen. *Z. Naturforschung B* **1965**, *20*, 1013–1013.
119. Huneck, S.; Follmann, G. Lichen constituents. XXVIII. Chemistry of Chilean lichen. Compounds from *Ramalina tigrina*, and *Ramalina inanis*. *Z. Naturforschung B* **1966**, *21*, 713–714.
120. Sasaki, G.L.; Cruz, L.M.; Gorin, P.A.J.; Iacomini, M. Fatty acid composition of lipids present in selected lichenized fungi: A chemotyping study. *Lipids* **2001**, *36*, 167–174.
121. Machado, M.J.; Guerrini, M.; Gorin, P.A.J.; Torri, G.; Iacomoni, M. A galactosphingolipid from the lichen, *Ramalina celastri*. *Phytochemistry* **1997**, *45*, 651–653.
122. Cetin, H.; Tufan-Cetin, O.; Turk, A.O.; Tay, T.; Candan, M.; Yanikoglu, A.; Sumbul, H. Insecticidal activity of major lichen compounds, (–)- and (+)-usnic acid, against the larvae of house mosquito, *Culex pipiens* L. *Parasitol. Res.* **2008**, *102*, 1277–1279.
123. Unal, D.; Senkardesler, A. Abscisic acid and polyamine contents in the lichens *Pseudevernia furfuracea* and *Ramalina farinacea*. A. Sukatar, *Russ. J. Plant Physiol.* **2008**, *55*, 115–118.
124. Mateos, J.L.; Legaz, M.E. Presence and Identification of Polyamines and their Conjugation to Phenolics in Some Epiphytic Lichens. *Eukaryotism and Symbiosis*; Springer-Verlag: Berlin, Germany, 1997; pp. 491–498.
125. Solberg, Y.J. Studies on the chemistry of lichens. IX Quantitative determination of monosaccharides and amino acids in hydrolysates of several Norwegian lichen species. *Lichenologist* **1970**, *4*, 283–288.
126. Ramakrishnan, S.; Subrmanian, S.S. Amino acids of *Lobaria subisidiosa*, *Umbilicaria pustulata*, *Parmelia nepalensis*, and *Ramalina sinensis*. *Curr. Sci. Indian* **1966**, *35*, 124–125.
127. Fujikawa, F.; Hirai, K.; Hirayama, T.; Toyota, T.; Urasaki, M.; Takagawa, M.; Fukuda, M.; Moritani, K.; Sanae, T. Free amino acids in lichens of Japan. *Yakugaku Zasshi* **1972**, *92*, 823–827.
128. Paudel, B.; Bhattarai, H.D.; Koh, H.Y.; Lee, S.G.; Han, S.J.; Lee, H.K.; Oh, H.; Shin, H.W.; Yim, J.H. Ramalin, a novel nontoxic antioxidant compound from the Antarctic lichen *Ramalina terebrata*. *Phytomedicine* **2011**, *18*, 1285–1290.
129. Yim, J.H.; Kim, I.C.; Han, S.J.; Lee, H.S.; Battarai, H.D.; Yang, S-G.; Lee, D.H. Ramalin for Preveting or Treating Hepatic Fibrosis and Liver Cirrhosis. WO 2013129714 A1, 6 September 2013.
130. Yim, J.H.; Kim, I.C.; Lee, S.G.; Kim, D.G.; Han, S.J.; Lee, H.S.; Kim, S.J.; Kim, T.G.; Kang, P.S.; Park, H.Y. Ramalin for Preveting and Treating Inflammatory Diseases and Immune Diseases. KR 1290745 B1, 29 September 2013.

131. Seo, C.; Yim, J.H.; Lee, H.K.; Park, S.M.; Sohn, J.H.; Oh, H. Stereocalpin A, a bioactive cyclic depsipeptide from the Antarctic lichen *Stereocaulon alpinum*. *Tetrahedron Lett.* **2008**, *49*, 29–31.
132. Byeon, H.E.; Park, B.K.; Yim, J.H.; Lee, H.K.; Moon, E.Y.; Rhee, D.K.; Pyo, S. Stereocalpin A inhibits the expression of adhesion molecules in activated vascular smooth muscle cells. *Int. Immunopharmacol.* **2012**, *12*, 315–325.
133. Yim, J.H.; Kim, I.C.; Kim, D.G.; Han, S.J.; Lee, H.S.; Oh, H.C.; Pyo, S.N. Stereocalpin-A for preventing or treating arteriosclerosis. KR 20130043995 A, 02 May 2013.
134. Pfau, A.S. Constituents of lichens. II. Constitution of barbatinic acid. *Helv. Chim Acta* **1928**, *11*, 864–876.
135. Huang, W.; Dai, W. The constituents of absolute from *Ramalina fastigiata* (Pors) Ach. The main ethyl ester of fatty acids. *Nat. Prod. Res. Dev.* **1989**, *1*, 27–28.
